# Supplementary material for: Evolutionary history of Methyltransferase 1 genes in hexaploid wheat
Source: PubMed Central journal article supplement (PMC4223845; doi:10.1186/1471-2164-15-922), 2014-10-23

# Additional file 1

## Additional file 1A: Likelihood ratio tests (LRT)

| Hypothesis | <i>Lnl</i> | $2\Delta l$ | <i>ddl</i> | LRT    | $\omega_0$ | $\omega_1$ | $\omega_2$ | P<0.05 | P<0.01 |
|------------|------------|-------------|------------|--------|------------|------------|------------|--------|--------|
| h0         | -21434.8   | -           | -          | -      | 0.23993    | -          | -          | -      | -      |
| h1         | -21330.6   | 104.1       | 1          | 0      | 0.17544    | 0.55407    | -          | ***    | ***    |
| h2         | -21434.3   | 0.4768      | 1          | 0.0383 | 0.23822    | 0.30632    | -          | *      | ns     |
| h3         | -21434.0   | 0.7571      | 1          | 0.0383 | 0.23567    | 0.26794    | -          | *      | ns     |
| h4         | -21434.8   | 0.0009      | 1          | 1      | 0.23986    | 0.24225    | -          | ns     | ns     |
| h5         | -21362.2   | 72.6        | 1          | 0      | 0.12974    | 0.32857    | -          | ***    | ***    |
| h6         | -21434.8   | -0.00004    | 1          | 1      | 0.23993    | 0.36697    | -          | ns     | ns     |
| h7         | -21362.2   | 72.6        | 1          | 0      | 0.12974    | 0.32858    | -          | ***    | ***    |
| h8         | -21434.6   | 0.2523      | 1          | 0.0617 | 0.21638    | 0.2417     | -          | ns     | ns     |
| h9         | -21433.4   | 1.4         | 1          | 0.0235 | 0.22161    | 0.2512     | -          | *      | ns     |
| h10        | -21330.6   | 104.1       | 1          | 0      | 0.17544    | 0.55407    | -          | ***    | ***    |
| h11        | -21326.0   | 108.8       | 2          | 0      | 0.12193    | 0.21988    | 0.48706    | ***    | ***    |

## Additional file 1B: Details of the 11 hypotheses tested in the branch model described in Fig 3B

h0: all the branches evolve at the same evolution rate

(((((TaMet-2D1,(TaMet-2A1,(TaMet-2B1,HvMet1-2))),BdMet1b),OsMet1b),((ZmMet1b-2,SbMet1b),ZmMet1b-1)),(((HvMet1-5,(TaMet-5A1,(TaMet-5D1,TaMet-5B1))),((HvMet1-7,TaMet-7B1),(TaMet-7A1,TaMet-7D1))),BdMet1a),(OsMet1a,SbMet1a)));

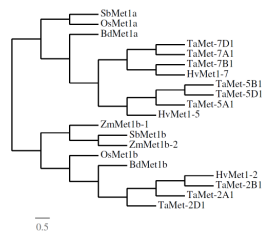

h1: the branches including group 5 homoeologs and HvMet1-5 evolve at the same rate which is significantly different from the rest of the tree

(((((TaMet-2D1,(TaMet-2A1,(TaMet-2B1,HvMet1-2))),BdMet1b),OsMet1b),((ZmMet1b-2,SbMet1b),ZmMet1b-1)),(((HvMet1-5 #1,(TaMet-5A1 #1,(TaMet-5D1 #1,TaMet-5B1 #1) #1) #1),((HvMet1-7,TaMet-7B1),(TaMet-7A1,TaMet-7D1))),BdMet1a),(OsMet1a,SbMet1a)));

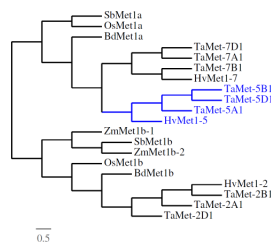

h2: evolution rate increases soon after the second duplication and return to its initial rate

(((TaMet-2D1,(TaMet-2A1,(TaMet-2B1,HvMet1-2))),BdMet1b),OsMet1b),((ZmMet1b-2,SbMet1b),ZmMet1b-1)),(((HvMet1-5,(TaMet-5A1,(TaMet-5D1,TaMet-5B1)))#1, ((HvMet1-7,TaMet-7B1),(TaMet-7A1,TaMet-7D1))),BdMet1a),(OsMet1a,SbMet1a));

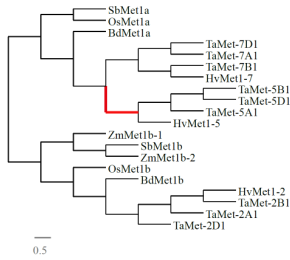

h3: the branches including group 7 homoeologs and HvMet1-7 evolve at the same rate which is significantly different from the rest of the tree

(((TaMet-2D1,(TaMet-2A1,(TaMet-2B1,HvMet1-2))),BdMet1b),OsMet1b),((ZmMet1b-2,SbMet1b),ZmMet1b-1)),(((HvMet1-5,(TaMet-5A1,(TaMet-5D1,TaMet-5B1 #1))),((HvMet1-7 #1,TaMet-7B1 #1) #1,(TaMet-7A1 #1,TaMet-7D1 #1) #1) #1),BdMet1a),(OsMet1a,SbMet1a));

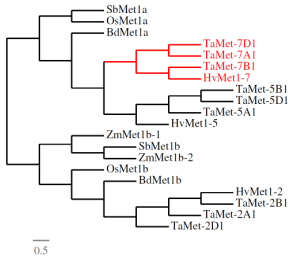

h4: evolution rate increases soon after the second duplication and return to its initial rate

(((TaMet-2D1,(TaMet-2A1,(TaMet-2B1,HvMet1-2))),BdMet1b),OsMet1b),((ZmMet1b-2,SbMet1b),ZmMet1b-1)),(((HvMet1-5,(TaMet-5A1,(TaMet-5D1,TaMet-5B1 #1))),((HvMet1-7,TaMet-7B1),(TaMet-7A1,TaMet-7D1) #1),BdMet1a),(OsMet1a,SbMet1a));

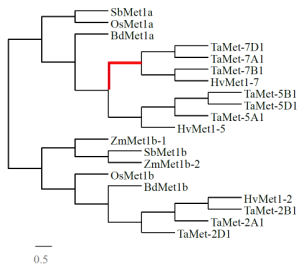

h5: the branches including MET1a lineage evolve at the same rate which is significantly different from the rest of the tree (i.e from MET1b lineage)

(((TaMet-2D1,(TaMet-2A1,(TaMet-2B1,HvMet1-2))),BdMet1b),OsMet1b),((ZmMet1b-2,SbMet1b),ZmMet1b-1)),(((HvMet1-5 #1,(TaMet-5A1 #1,(TaMet-5D1 #1,TaMet-5B1 #1) #1) #1,((HvMet1-7 #1,TaMet-7B1 #1) #1,(TaMet-7A1 #1,TaMet-7D1 #1) #1) #1),BdMet1a #1),(OsMet1a #1,SbMet1a #1) #1) #1);

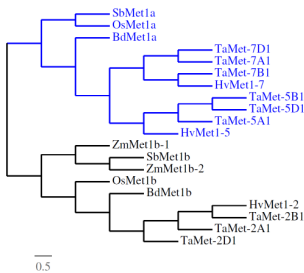

h6: evolution rate increases soon after the first duplication and return to its initial rate  
 (((((TaMet-2D1,(TaMet-2A1,(TaMet-2B1,HvMet1-2))),BdMet1b),OsMet1b),((ZmMet1b-2,SbMet1b),ZmMet1b-1)),(((HvMet1-5,(TaMet-5A1,(TaMet-5D1,TaMet-5B1))),((HvMet1-7,TaMet-7B1),(TaMet-7A1,TaMet-7D1))),BdMet1a),(OsMet1a,SbMet1a)) #1);

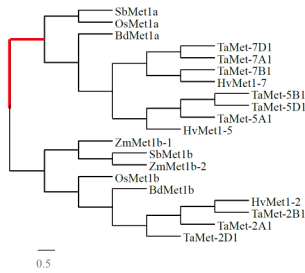

h7: the branches including MET1b lineage evolve at the same rate which is significantly different from the rest of the tree (i.e from MET1a lineage)  
 (((((TaMet-2D1 #1,(TaMet-2A1 #1,(TaMet-2B1 #1,HvMet1-2 #1) #1) #1),BdMet1b #1),OsMet1b#1) #1,((ZmMet1b-2 #1,SbMet1b #1) #1,ZmMet1b-1 #1) #1),(((HvMet1-5,(TaMet-5A1,(TaMet-5D1,TaMet-5B1))),((HvMet1-7,TaMet-7B1),(TaMet-7A1,TaMet-7D1))),BdMet1a),(OsMet1a,SbMet1a));

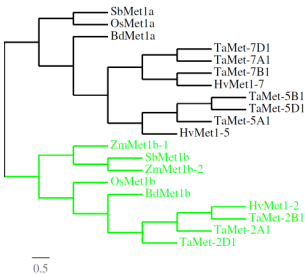

h8: evolution rate increases soon after the first duplication and return to its initial rate

(((TaMet-2D1,(TaMet-2A1,(TaMet-2B1,HvMet1-2))),BdMet1b),OsMet1b),((ZmMet1b-2,SbMet1b),ZmMet1b-1) #1,(((HvMet1-5,(TaMet-5A1,(TaMet-5D1,TaMet-5B1))),((HvMet1-7,TaMet-7B1),(TaMet-7A1,TaMet-7D1))),BdMet1a),(OsMet1a,SbMet1a));

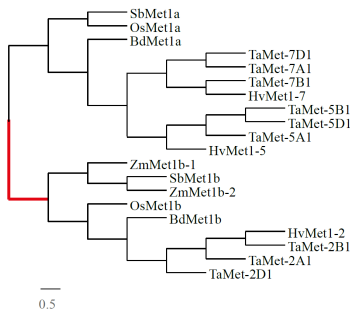

h9: the branches including MET1a lineage except group 5 homoeologs and HvMet1-5 evolve at the same rate which is significantly different from the rest of the tree

(((TaMet-2D1,(TaMet-2A1,(TaMet-2B1,HvMet1-2))),BdMet1b),OsMet1b),((ZmMet1b-2,SbMet1b),ZmMet1b-1),(((HvMet1-5,(TaMet-5A1,(TaMet-5D1,TaMet-5B1))),((HvMet1-7 #1,TaMet-7B1 #1) #1,(TaMet-7A1 #1,TaMet-7D1 #1) #1) #1),BdMet1a #1),(OsMet1a #1,SbMet1a #1) #1);

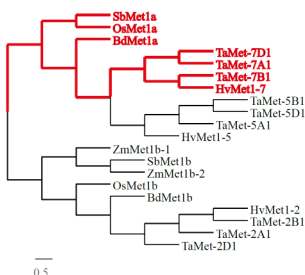

h10: all branches except group 5 homoeologs and HvMet1-5 evolve at a different rate which is significantly different from group 5 homoeologs and HvMet1-5 (reciprocal to h1)

(((TaMet-2D1 #1,(TaMet-2A1 #1,(TaMet-2B1 #1,HvMet1-2 #1) #1) #1,BdMet1b #1) #1,OsMet1b#1) #1,((ZmMet1b-2 #1,SbMet1b #1) #1,ZmMet1b-1 #1) #1,(((HvMet1-5,(TaMet-5A1,(TaMet-5D1,TaMet-5B1 ))) ,((HvMet1-7 #1,TaMet-7B1 #1) #1,(TaMet-7A1 #1,TaMet-7D1 #1) #1) #1) #1,BdMet1a #1) #1,(OsMet1a #1,SbMet1a #1) #1) #1);

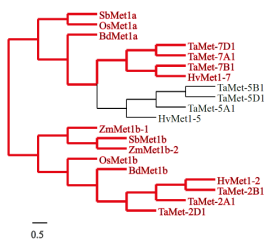

h11: 3 evolution rates are observed, one for branches including group 5 homoeologs and HvMet1-5, one for group 7 homoeologs and HvMet1-7 and one for the MET1b lineage

(((TaMet-2D1 #2,(TaMet-2A1 #2,(TaMet-2B1 #2,HvMet1-2 #2) #2) #2,BdMet1b #2),OsMet1b #2) #2,((ZmMet1b-2 #2,SbMet1b #2) #2,ZmMet1b-1 #2) #2,(((HvMet1-5,(TaMet-5A1,(TaMet-5D1,TaMet-5B1 ))) ,((HvMet1-7 #1,TaMet-7B1 #1) #1,(TaMet-7A1 #1,TaMet-7D1 #1) #1) #1) #1,BdMet1a #1) #1,(OsMet1a #1,SbMet1a #1) #1) #1);

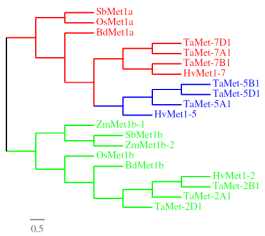

Supplement: 12864_2014_6631_MOESM1_ESM.pdf [file 12864_2014_6631_MOESM1_ESM.pdf]
