# Supplementary material for: Evolutionary history of Methyltransferase 1 genes in hexaploid wheat
Source: PubMed Central journal article supplement (PMC4223845; doi:10.1186/1471-2164-15-922), 2014-10-23
Supplement: 12864_2014_6631_MOESM2_ESM.pdf [file 12864_2014_6631_MOESM2_ESM.pdf]

## Additional file 2

|          | <b>2B</b>   |              | <b>5B</b>  |              | <b>7A</b>   |              |
|----------|-------------|--------------|------------|--------------|-------------|--------------|
| Position | ITMI        | Position/top | ITMI       | Position/top | ITMI        | Position/top |
| proximal | Xgpw4382-2B | 60.4         | Xgwm604-5B | 101.5        | Xcfa2040-7A | 226.5        |
| distal   | Xgpw2225-2B | 60           | Xfbb323-5B | 121.2        | Xgpw4050-7A | 275.8        |
