# Supplementary material for: Evolutionary history of Methyltransferase 1 genes in hexaploid wheat
Source: PubMed Central journal article supplement (PMC4223845; doi:10.1186/1471-2164-15-922), 2014-10-23

# Additional file 5

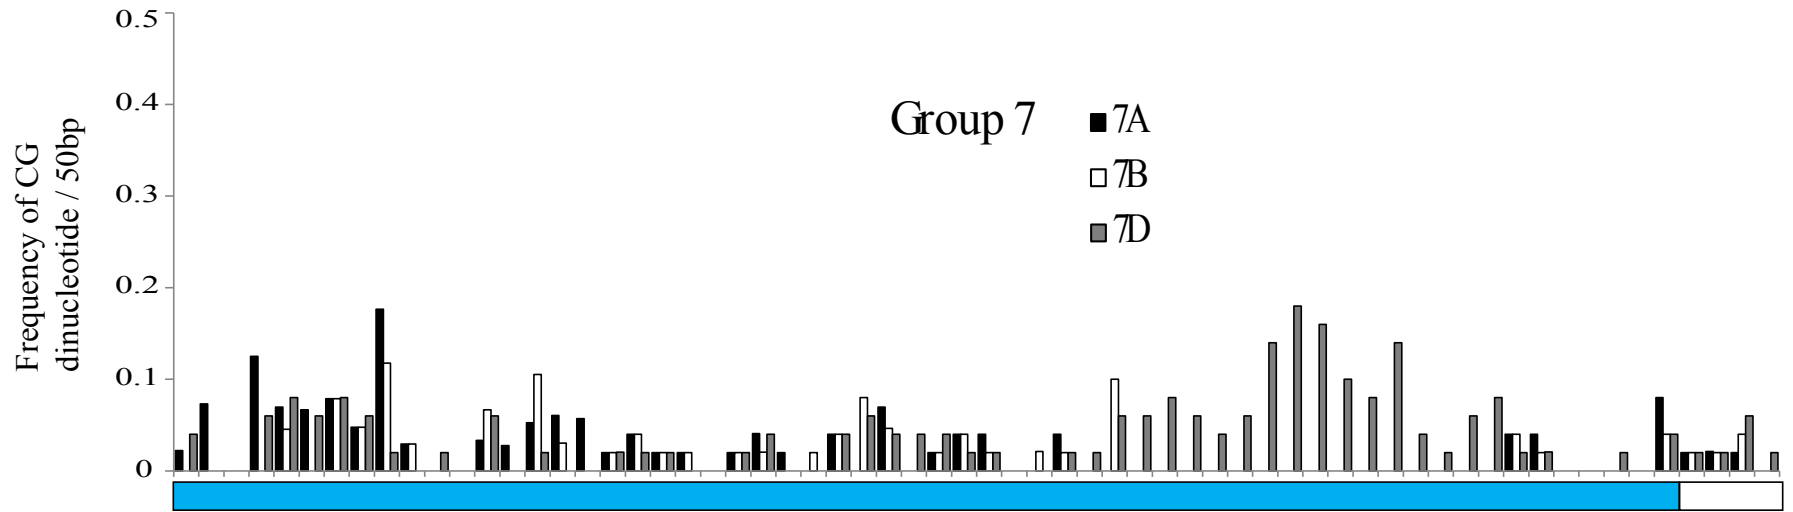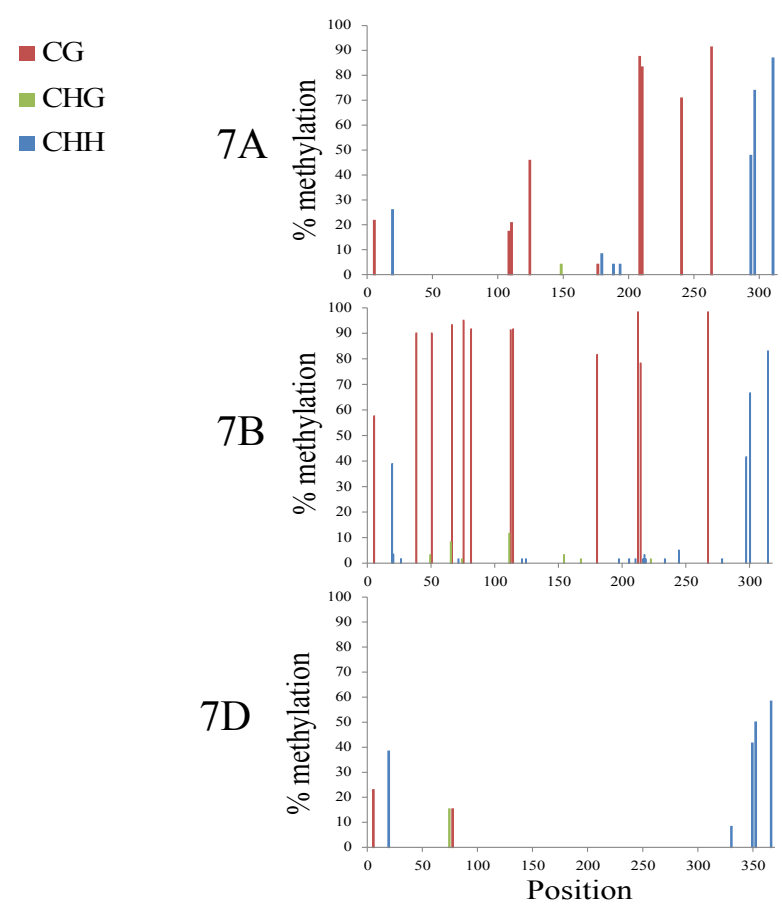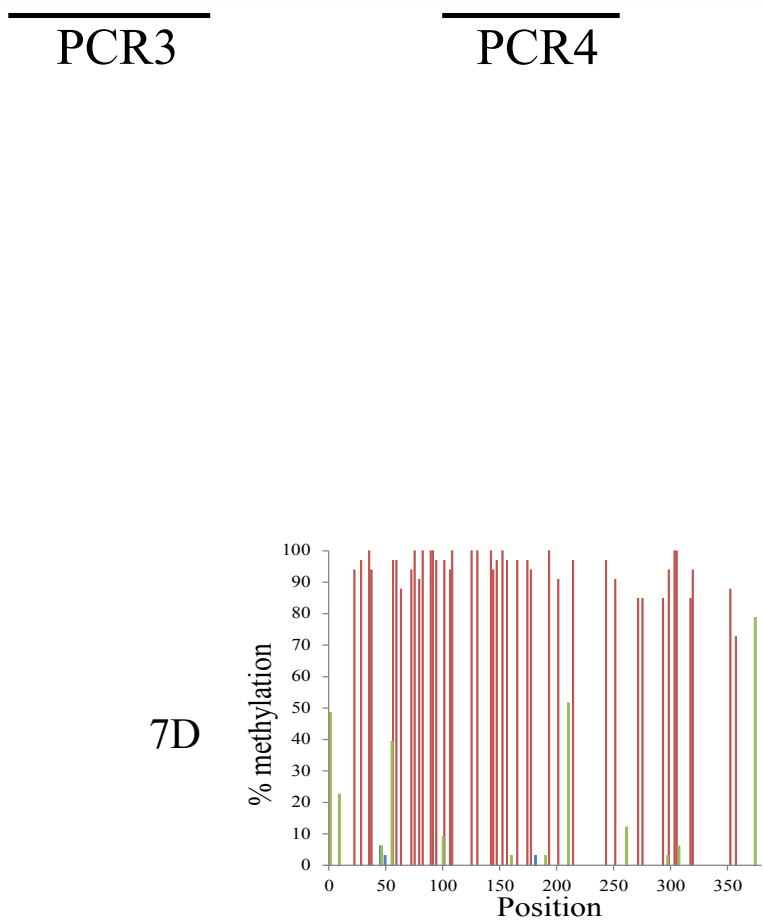

Supplement: 12864_2014_6631_MOESM5_ESM.pdf [file 12864_2014_6631_MOESM5_ESM.pdf]
