# Supplementary material for: Evolutionary history of Methyltransferase 1 genes in hexaploid wheat
Source: PubMed Central journal article supplement (PMC4223845; doi:10.1186/1471-2164-15-922), 2014-10-23
Supplement: 12864_2014_6631_MOESM6_ESM.pdf [file 12864_2014_6631_MOESM6_ESM.pdf]

## Additional file 6

| Gene        | Homoeolog specificity | Methods                                         | Forward primer (5' to 3')                             | reverse primer (5' to 3')                        | Remarks                                             |
|-------------|-----------------------|-------------------------------------------------|-------------------------------------------------------|--------------------------------------------------|-----------------------------------------------------|
| MET1-group2 | 2BD                   | BS                                              | TGATTTAYTTGGAGTGGTATGG                                | TTTCACAACRTRTTTTCTCTTCC                          |                                                     |
|             | 2A                    | BS                                              | GYTTTAYTTGGAGTGGTATGAA                                | TTTCACAACRTRTTTTCTCTTCC                          |                                                     |
|             | 2A                    | RT-PCR                                          | GATAGGATTATCACAGTCCGC                                 | GCAAGAGGGGGTGGCACA                               |                                                     |
|             | 2B                    | RT-PCR                                          | TGTGCCACCCCTCTTGC                                     | CAGTTCATGCCAGCCATGC                              |                                                     |
|             | 2D                    | RT-PCR                                          | GACCAGGATAGGATTATCACG                                 | CCAGCCACGCACAATAAAGA                             |                                                     |
|             | 2A                    | Q-RT-PCR                                        | CAGTTTTCGGGCACCATTC                                   | CCAGTCACGCACAATAGAGG                             |                                                     |
|             | 2B                    | Q-RT-PCR                                        | CAGTTTTCGGGCACCATTC                                   | CAGTTCATGCCAGCCATGC                              |                                                     |
|             | 2D                    | Q-RT-PCR                                        | TGTGCCACCCCTCTTGC                                     | CCAGCCACGCACAATAAAGA                             |                                                     |
|             | 2B                    | Mapping                                         | GAAGGTGACCAAGTTCATGCTCA<br>GTTACGGGCTAGCAAACACG       | GCTCCTGGAGAGATTCTTCTCTGATT                       | marker 52, Population Renan<br>x Recital, SNP =G    |
| 2B          | Mapping               | GAAGTCGGAGTCAACGGATTTC<br>AGTTCAGGGCTAGCAAACACT | TTCTTCTGATTGGCCAGAACCAT                               | marker 52, Population Renan<br>x Recital, SNP =T |                                                     |
| MET1-group5 | 5A                    | Mapping                                         | GAAGGTGACCAAGTTCATGCTCA<br>CTTGTGCTCGGCAACTACAA       | GGGAACAAAATCTACTGTCAACTATG<br>CTT                | marker 51, Population Renan<br>x Recital, SNP =A    |
|             | 5A                    | Mapping                                         | GAAGTCGGAGTCAACGGATTAC<br>TTGTGCTCGGCAACTACAC         | CTACTGTCAACTATGCTTCATTTTAG<br>CCAA               | marker 51, Population Renan<br>x Recital, SNP =C    |
|             | 5B                    | Mapping                                         | GAAGGTGACCAAGTTCATGCTAC<br>ATTCTTAGTAAGCAACCATGTGT    | CCTGTGGATAGCTTACCTGTACTA                         | marker 35, Population Renan<br>x Recital, SNP =A    |
|             | 5B                    | Mapping                                         | GAAGGTGACCAAGTTCATGCTCC<br>CAGATGAACGCCCTTTTCCTA      | ATTCCGCATTCTAGAAGCAGGTTTCA<br>T                  | marker 43, Population Renan<br>x Recital, SNP =A    |
|             | 5B                    | Mapping                                         | GAAGGTGACCAAGTTCATGCTGA<br>GGCGAGCCCATCTCCTG          | GCAAAAGCGTATCGCCTCGAATCIT                        | marker 48, Population Renan<br>x Recital, SNP =C    |
|             | 5B                    | Mapping                                         | GAAGTCGGAGTCAACGGATTAC<br>ATTCTTAGTAAGCAACCATGTGC     | GCTTACCTGTACTATTACATGATG<br>AAA                  | marker 35, Population Renan<br>x Recital, SNP =G    |
|             | 5B                    | Mapping                                         | GAAGTCGGAGTCAACGGATTCC<br>AGATGAACGCCCTTTTCCTG        | CAGGTTTCATATGGCATCGCGCATT                        | marker 43, Population Renan<br>x Recital, SNP =G    |
|             | 5B                    | Mapping                                         | GAAGTCGGAGTCAACGGATTGG<br>AGCGGAGCCCATCTCCTA          | GTATCGCCTCGAATCTTCTTCTGGAA                       | marker 48, Population Renan<br>x Recital, SNP =T    |
|             | 5B                    | BS                                              | TTYATGYAAGGAAGTGGYAG                                  | AACTCCTTTACCTTTTTRTCATC                          |                                                     |
|             | 5B                    | BS                                              | GTTTTGYGGGAGGATTG                                     | TCRRCCATCATTCATCC                                |                                                     |
|             | 5B                    | BS                                              | GGTGGGTTYTYAAYTTTTGAT                                 | AACCACATRTCCATRTAAAACC                           |                                                     |
|             | 5D                    | BS                                              | TTYATGYAAGGAAGTGGYGG                                  | TCCTTCCCTTTTTRTTRTCAC                            |                                                     |
|             | 5D                    | BS                                              | GAAYTGTGAAGGAYTATYTG                                  | ARATCCTCRACAAAACATCAT                            |                                                     |
|             | 5ABD                  | BS                                              | ATYTGAAYTTYTAATTAGGATGT                               | TCCCCTRTAAARTTTARAATCA                           |                                                     |
|             | 5A                    | RT-PCR                                          | TCGATGATCTGCATATCTATTTC                               | ACTGCTTCGTTGGCTGGAG                              |                                                     |
| 5B          | RT-PCR                | CAGGAAGATCAAGGGATTCC                            | ACTGCTTCGTTGGCTGGAG                                   |                                                  |                                                     |
| 5D          | RT-PCR                | GTGCTAAAAATGATACTGTTATC                         | ACTGCTTCGTTGGCTGGAG                                   |                                                  |                                                     |
| 7A          | 7A                    | Mapping                                         | GAAGGTGACCAAGTTCATGCTAT<br>GCATCTTCGCTGAGTGATCACA     | TGAGATTGAGCTCATTATTCTTTTA<br>GCTA                | marker 20, population<br>Brigadier x Alcedo, SNP =A |
|             | 7A                    | Mapping                                         | GAAGGTGACCAAGTTCATGCTAA<br>CTCCACCGTTTGCCTGTGC        | CAATCATGTGATGTACTGGYAGCTGA<br>T                  | marker 22, Population Renan<br>x Recital, SNP =G    |
|             | 7A                    | Mapping                                         | GAAGGTGACCAAGTTCATGCTAG<br>CACCTGCCTCTAAAATCCAAAT     | GCATTCCCTCATTCCCACATGTTCTA<br>AA                 | marker 24, Population Renan<br>x Recital, SNP =A    |
|             | 7A                    | Mapping                                         | GAAGGTGACCAAGTTCATGCTGA<br>TTGGCCTGAACCGATGCAC        | GCATAGTATTTCCCTTCTGGTAGATT<br>GAT                | marker 25, Population Renan<br>x Recital, SNP =C    |
|             | 7A                    | Mapping                                         | GAAGGTGACCAAGTTCATGCTAG<br>TCAGGGATACAATTGGTGATCTC    | TACTATACACCTACCGGTATTGTGG<br>TIT                 | marker 26, Population Renan<br>x Recital, SNP =C    |
|             | 7A                    | Mapping                                         | GAAGGTGACCAAGTTCATGCTCA<br>ACAGAAGTCTGATTATGAAGT<br>T | TATGGGCCTTCTGACTGAAAAGATCA<br>AAA                | marker 30, Population Renan<br>x Recital, SNP =A    |
|             | 7A                    | Mapping                                         | GAAGGTGACCAAGTTCATGCTGG<br>CGTAATTTGACCTGAAATC        | CGATGAAAGCTCCCTCTAACTTACAT<br>AT                 | marker 34, population<br>Brigadier x Alcedo, SNP =G |

|             |    |         |                                                            |                                    |                                                     |
|-------------|----|---------|------------------------------------------------------------|------------------------------------|-----------------------------------------------------|
| MET1-group7 | 7A | Mapping | GAAGGTGACCAAGTTCATGCTGA<br>TGCAATCATCAACATCACCACAC         | TGACCATTGCGCTTTGCAGGGCAAT          | marker 41, population<br>Brigadier x Alcedo, SNP =C |
|             | 7A | Mapping | GAAGGTGGAGTCAACGGATTGC<br>ATCTTCGCTGAGTGATCAGC             | GCACCTTATGAGATTGAGCTCATICA<br>TTT  | marker 20, population<br>Brigadier x Alcedo, SNP =G |
|             | 7A | Mapping | GAAGGTGGAGTCAACGGATTCA<br>ACTCCACCGTTTGCCTGTGA             | GCTGTGCGTGCAGGTGAAGCTA             | marker 22, Population Renan<br>x Recital, SNP =T    |
|             | 7A | Mapping | GAAGGTGGAGTCAACGGATTCA<br>CCTGCCTCTAAAATCCCAAC             | TCCCACATGTTCTAAACTTCTCTGCA<br>TTT  | marker 24, Population Renan<br>x Recital, SNP =G    |
|             | 7A | Mapping | GAAGGTGGAGTCAACGGATTCT<br>GATTGGCCTGAACCGATGCAT            | TGATTTTCAGCTCAGGGCTGGAGAA          | marker 25, Population Renan<br>x Recital, SNP =T    |
|             | 7A | Mapping | GAAGGTGGAGTCAACGGATTAG<br>TCAGGATACAATTGGTGATCTG           | GGTATTGTTGGTTGTGCGCACCAT           | marker 26, Population Renan<br>x Recital, SNP =G    |
|             | 7A | Mapping | GAAGGTGGAGTCAACGGATTCA<br>ACAGAACTAGCTGATTATGAATG<br>C     | AAGACCGGTAACACTTGTGGCTT            | marker 30, Population Renan<br>x Recital, SNP =G    |
|             | 7A | Mapping | GAAGGTGGAGTCAACGGATTGG<br>CTGGCGTAATTTGTACCTGAAAT<br>A     | CTCCCTCTAACTTACATATGGATCTC<br>AAT  | marker 34, population<br>Brigadier x Alcedo, SNP =T |
|             | 7A | Mapping | GAAGGTGGAGTCAACGGATTGA<br>TGCAATCATCAACATCACCACAG          | GCCTTTGCAGGGCAATAATGGACAA          | marker 41, population<br>Brigadier x Alcedo, SNP =G |
|             | 7B | Mapping | GAAGGTGACCAAGTTCATGCTGC<br>ATTTATTTCAACAATGCAGCGC          | TGAAGAATTATCTGTCCATGCACCAC<br>AA   | marker 04, population<br>Brigadier x Alcedo, SNP =C |
|             | 7B | Mapping | GAAGGTGACCAAGTTCATGCTAT<br>GCACCACAACATATCGTTCAACG         | AATTTGAGAAAGGGCAGCCTGCATTT<br>ATT  | marker 05, population<br>Brigadier x Alcedo, SNP =C |
|             | 7B | Mapping | GAAGGTGACCAAGTTCATGCTCA<br>CTTGCTTCGAATTTCTAAACAGTC<br>ATT | CTGTCTTGGCAATGCTGCAAAATGAA         | marker 06, population<br>Brigadier x Alcedo, SNP =A |
|             | 7B | Mapping | GAAGGTGACCAAGTTCATGCTTG<br>CTCTCTCTGTTTGTCCCTA             | AAAAAATGCAGAGGTTTAGAACATGT<br>GGAA | marker 09, population<br>Brigadier x Alcedo, SNP =A |
|             | 7B | Mapping | GAAGGTGACCAAGTTCATGCTGA<br>GAGGGAGGCGGCAGC                 | ATTTGCTGGCAACATCCAGAGCAA           | marker 11, population<br>Brigadier x Alcedo, SNP =C |
|             | 7B | Mapping | GAAGGTGGAGTCAACGGATTGC<br>ATTTATTTCAACAATGCAGCGG           | CTGTCCATGCACCACAACATATCGTT         | marker 04, population<br>Brigadier x Alcedo, SNP =G |
|             | 7B | Mapping | GAAGGTGGAGTCAACGGATTCA<br>TGCACCACAACATATCGTTCAAC<br>A     | AAGGGCAGCCTGCATTTATTTCAACA<br>AAT  | marker 05, population<br>Brigadier x Alcedo, SNP =T |
|             | 7B | Mapping | GAAGGTGGAGTCAACGGATTAC<br>TTGCTTCGAATTTCTAAACAGTCA<br>TC   | GCAATGCTGCAAAATGAACGAGAGGTT        | marker 06, population<br>Brigadier x Alcedo, SNP =G |
|             | 7B | Mapping | GAAGGTGGAGTCAACGGATTGC<br>TCTCCTCTGTTTGTCCCTG              | GAGGTTTAGAACATGTGGAAATGAAG<br>GAA  | marker 09, population<br>Brigadier x Alcedo, SNP =G |
|             | 7B | Mapping | GAAGGTGGAGTCAACGGATTGA<br>GAGGGAGGCGGCACC                  | TCCAGAGCAAGCACCAGGAGAT             | marker 11, population<br>Brigadier x Alcedo, SNP =G |
|             | 7A | BS      | GGGTYGAGTTTGTATAAYTTA                                      | AAARCCAAAACAATAARAARAC             |                                                     |
|             | 7B | BS      | GGGTYGAGTTTGTATAAYYTA                                      | AAARCCAAAACAATAARAARAC             |                                                     |
|             | 7D | BS      | GGGTYGAGTTTGTATAAYATA                                      | AAARCCAAAACAATAARAARAC             |                                                     |
|             | 7D | BS      | YGGGTGGYAGAGAAGAATG                                        | ACACARACTCCTCTAAATTCAC             |                                                     |
|             | 7A | RT-PCR  | CATGCTTGAGGAGAACTG                                         | ATCTTTGCAAGAAGTCCAGTG              |                                                     |
|             | 7A | RT-PCR  | CAGGATCATCACTGTTTCGTG                                      | AATGACGAGCCTTGATATCATG             |                                                     |
|             | 7D | RT-PCR  | CAGGATCATCACTGTTTCGTG                                      | GGCACCAGCCTGTATATAG                |                                                     |
|             | 7D | RT-PCR  | GCTCAAGCAAGCCATCGAC                                        | GGCACCAGCCTGTATATAG                |                                                     |
| VRN-A1      | A  | BS      | AAATGATTTGGGAAAGCAAATC<br>C                                | GAGGGGTTTTAAAGGGATCTGGCCC          | 0.0 k fragment from Khan et<br>al 2013              |
|             | A  | BS      | GGAYAAAATYTTGAAYGGTATG<br>AG                               | TTTCTAARCCCTTCAAAAACCTCA           | 9.2 k fragment from Khan et<br>al 2013              |
