# Supplementary material for: Evolutionary history of Methyltransferase 1 genes in hexaploid wheat
Source: PubMed Central journal article supplement (PMC4223845; doi:10.1186/1471-2164-15-922), 2014-10-23
Supplement: 12864_2014_6631_MOESM7_ESM.pdf [file 12864_2014_6631_MOESM7_ESM.pdf]

## Additional file 7

| CHROMOSOME ARM | IWGSC CONTIG | IWGSC ORDER | Os NAME      | Os ORDER | Bd NAME        | Bd ORDER |
|----------------|--------------|-------------|--------------|----------|----------------|----------|
| 5AL            | 5AL:2744104  | 1           | Os03g58040.1 | 1        | Bradi1g05680.1 | 1        |
| 5AL            | 5AL:2732873  | 2           | Os03g58050.1 | 2        | Bradi1g05670.1 | 2        |
| 5AL            | 5AL:2734524  | 3           | Os03g58060.1 | 3        | Bradi1g05660.1 | 3        |
| 5AL            | 5AL:2732731  | 4           | Os03g58070.1 | 4        | Bradi1g05650.1 | 4        |
| 5AL            | 5AL:2736066  | 5           | Os03g58080.1 | 5        | Bradi1g05630.1 | 5        |
| 5AL            | 5AL:2695737  | 6           | Os03g58090.1 | 6        | Bradi1g05620.1 | 6        |
| 5AL            | 5AL:2763495  | 7           | Os03g58100.1 | 7        | Bradi1g05610.1 | 7        |
| 5AL            | 5AL:343725   | 8           | Os03g58110.1 | 8        | Bradi1g05600.1 | 8        |
| 5AL            | 5AL:2686684  | 9           | Os03g58120.1 | 9        | Bradi1g05590.1 | 9        |
| 5AL            | 5AL:353991   | 10          | Os03g58130.1 | 10       | Bradi1g05580.1 | 10       |
| 5AL            | 5AL:2760754  | 11          | Os03g58140.1 | 11       | Bradi1g05570.1 | 11       |
| 5AL            | 5AL:2760754  | 12          | Os03g58150.1 | 12       | Bradi1g05560.1 | 12       |
| 5AL            | 5AL:683544   | 13          | Os03g58160.1 | 13       | Bradi1g05550.1 | 13       |
| 5AL            | 5AL:2800470  | 14          | Os03g58170.1 | 14       |                |          |
| 5AL            | 5AL:2102481  | 15          |              |          | Bradi1g05540.1 | 14       |
| 5AL            | 5AL:2694483  | 16          | Os03g58190.1 | 15       | Bradi1g05520.1 | 15       |
| 5AL            | 5AL:2691246  | 17          | Os03g58204.1 | 16       | Bradi1g05510.1 | 16       |
| 5AL            | 5AL:1744178  | 18          | Os03g58240.1 | 17       | Bradi1g05490.1 | 17       |
| 5AL            | 5AL:2741360  | 19          | Os03g58250.1 | 18       | Bradi1g05480.1 | 18       |
| 5AL            | 5AL:2801238  | 20          | Os03g58260.1 | 19       |                |          |
| 5AL            | 5AL:2759119  | 21          |              |          | Bradi1g05470.1 | 19       |
| 5AL            | 5AL:1126042  | 22          | Os03g58290.1 | 20       | Bradi1g05460.1 | 20       |
| 5AL            | 5AL:1126042  | 23          | Os03g58300.1 | 21       | Bradi1g05450.1 | 21       |
| 5AL            | 5AL:1126042  | 24          | Os03g58320.1 | 22       |                |          |
| 5AL            | 5AL:2796056  | 25          | Os03g58330.1 | 23       | Bradi1g05430.1 | 22       |
| 5AL            | 5AL:2802820  | 26          | Os03g58340.1 | 24       | Bradi1g05420.1 | 23       |
| 5AL            | 5AL:2802820  | 27          |              |          | Bradi1g05410.1 | 24       |
| 5AL            | 5AL:2799595  | 28          | Os03g58390.1 | 25       | Bradi1g05390.1 | 25       |
| 5AL            | 5AL:2806153  | 29          | Os03g58400.1 | 26       |                |          |
| 5AL            | 5AL:2672180  | 30          |              |          | Bradi1g05380.1 | 26       |
| 5AL            | 5AL:32991    | 31          | Os03g58420.1 | 27       | Bradi1g05350.1 | 27       |
| 5AL            | 5AL:2734204  | 32          | Os03g58430.1 | 28       | Bradi1g05340.1 | 28       |
| 5AL            | 5AL:1181641  | 33          | Os03g58480.1 | 29       | Bradi1g05320.1 | 29       |
| 5AL            | 5AL:361545   | 34          | Os03g58520.1 | 30       | Bradi1g05260.1 | 30       |
| 5AL            | 5AL:429134   | 35          | Os03g58530.1 | 31       | Bradi1g05250.1 | 31       |
| 5AL            | 5AL:2376817  | 36          | Os03g58540.1 | 32       | Bradi1g05240.1 | 32       |
| 5AL            | 5AL:2741481  | 37          |              |          | Bradi1g05200.1 | 33       |
| 5AL            | 5AL:1594861  | 38          | Os03g58570.1 | 33       | Bradi1g05190.1 | 34       |
| 5AL            | 5AL:2789791  | 39          | Os03g58590.1 | 34       | Bradi1g05170.1 | 35       |
| 5AL            | 5AL:2748163  | 40          | Os03g58600.1 | 35       | Bradi1g05160.1 | 36       |
| 5AL            | 5AL:2352467  | 41          | Os03g58620.1 | 36       |                |          |
| 5AL            | 5AL:2809517  | 42          | Os03g58630.1 | 37       |                |          |
| 5AL            | 5AL:2803096  | 43          |              |          | Bradi1g05150.1 | 37       |
| 5AL            | 5AL:2798135  | 44          |              |          | Bradi1g05140.1 | 38       |
| 5AL            | 5AL:2806991  | 45          |              |          | Bradi1g05130.1 | 39       |
| 5AL            | 5AL:941218   | 46          |              |          | Bradi1g05120.1 | 40       |
| 5AL            | 5AL:2768199  | 47          |              |          | Bradi1g05110.1 | 41       |

TaMet-5A1

TaMet-5A1

|     |              |    |              |    |                |    |
|-----|--------------|----|--------------|----|----------------|----|
| 5AL | 5AL:2806991  | 48 | Os03g58640.1 | 38 |                |    |
| 5AL | 5AL:598579   | 49 | Os03g58670.1 | 39 |                |    |
| 5AL | 5AL:2782620  | 50 | Os03g58700.1 | 40 |                |    |
| 5AL | 5AL:2809814  | 51 | Os03g58710.1 | 41 |                |    |
| 5AL | 5AL:2768199  | 52 | Os03g58720.1 | 42 |                |    |
| 5AL | 5AL:828164   | 53 | Os03g58740.1 | 43 | Bradi1g05100.1 | 42 |
| 5AL | 5AL:2353167  | 54 |              |    | Bradi1g05080.1 | 43 |
| 5AL | 5AL:1685317  | 55 | Os03g58780.1 | 44 | Bradi1g05070.1 | 44 |
| 5AL | 5AL:2805920  | 56 | Os03g58820.1 | 45 | Bradi1g05060.1 | 45 |
| 5AL | 5AL:2796269  | 57 | Os03g58830.1 | 46 | Bradi1g05040.1 | 46 |
| 5AL | 5AL:1230154  | 58 | Os03g58840.1 | 47 | Bradi1g05030.1 | 47 |
| 5AL | 5AL:2741244  | 59 | Os03g58850.1 | 48 |                |    |
| 5AL | 5AL:2809741  | 60 |              |    | Bradi1g05020.1 | 48 |
| 5AL | 5AL:2682679  | 61 | Os03g58870.1 | 49 | Bradi1g05010.1 | 49 |
| 5AL | 5AL:986955   | 62 | Os03g58890.1 | 50 | Bradi1g05000.1 | 50 |
| 5AL | 5AL:1907283  | 63 | Os03g58900.1 | 51 | Bradi1g04990.1 | 51 |
| 5AL | 5AL:2783401  | 64 | Os03g58910.2 | 52 | Bradi1g04980.1 | 52 |
| 5AL | 5AL:2805442  | 65 |              |    | Bradi1g04960.1 | 53 |
| 5BL | 5BL:10816777 | 1  | Os03g58040.1 | 1  | Bradi1g05680.1 | 1  |
| 5BL | 5BL:10797603 | 2  | Os03g58050.1 | 2  | Bradi1g05670.1 | 2  |
| 5BL | 5BL:10806818 | 3  | Os03g58060.1 | 3  | Bradi1g05660.1 | 3  |
| 5BL | 5BL:10721087 | 4  | Os03g58070.1 | 4  | Bradi1g05650.1 | 4  |
| 5BL | 5BL:10824935 | 5  |              |    | Bradi1g05640.1 | 5  |
| 5BL | 5BL:8729501  | 6  | Os03g58080.1 | 5  | Bradi1g05630.1 | 6  |
| 5BL | 5BL:2853232  | 7  | Os03g58090.1 | 6  | Bradi1g05620.1 | 7  |
| 5BL | 5BL:10806811 | 8  | Os03g58100.1 | 7  | Bradi1g05610.1 | 8  |
| 5BL | 5BL:10806811 | 9  | Os03g58110.1 | 8  | Bradi1g05600.1 | 9  |
| 5BL | 5BL:10887964 | 10 | Os03g58120.1 | 9  | Bradi1g05590.1 | 10 |
| 5BL | 5BL:10845579 | 11 | Os03g58130.1 | 10 | Bradi1g05580.1 | 11 |
| 5BL | 5BL:10845579 | 12 | Os03g58140.1 | 11 | Bradi1g05570.1 | 12 |
| 5BL | 5BL:10845579 | 13 | Os03g58150.1 | 12 | Bradi1g05560.1 | 13 |
| 5BL | 5BL:10845579 | 14 | Os03g58160.1 | 13 | Bradi1g05550.1 | 14 |
| 5BL | 5BL:10920668 | 15 | Os03g58170.1 | 14 | Bradi1g05540.1 | 15 |
| 5BL | 5BL:10890955 | 16 | Os03g58180.1 | 15 | Bradi1g05530.1 | 16 |
| 5BL | 5BL:10899556 | 17 | Os03g58190.1 | 16 | Bradi1g05520.1 | 17 |
| 5BL | 5BL:10837461 | 18 | Os03g58204.1 | 17 | Bradi1g05510.1 | 18 |
| 5BL | 5BL:10826094 | 19 | Os03g58230.1 | 18 | Bradi1g05500.1 | 19 |
| 5BL | 5BL:10792150 | 20 | Os03g58240.1 | 19 | Bradi1g05490.1 | 20 |
| 5BL | 5BL:10189661 | 21 | Os03g58250.1 | 20 | Bradi1g05480.1 | 21 |
| 5BL | 5BL:10839350 | 22 | Os03g58260.1 | 21 | Bradi1g05470.1 | 22 |
| 5BL | 5BL:10899718 | 23 | Os03g58290.1 | 22 | Bradi1g05460.1 | 23 |
| 5BL | 5BL:10899718 | 24 |              |    | Bradi1g05450.1 | 24 |
| 5BL | 5BL:10807820 | 25 | Os03g58300.1 | 23 |                |    |
| 5BL | 5BL:10924991 | 26 | Os03g58320.1 | 24 |                |    |
| 5BL | 5BL:10825701 | 27 | Os03g58330.1 | 25 |                |    |
| 5BL | 5BL:10825701 | 28 |              |    | Bradi1g05430.1 | 25 |
| 5BL | 5BL:10921140 | 29 | Os03g58340.1 | 26 | Bradi1g05420.1 | 26 |
| 5BL | 5BL:10921140 | 30 | Os03g58350.1 | 27 | Bradi1g05410.1 | 27 |
| 5BL | 5BL:10864426 | 31 | Os03g58380.1 | 28 |                |    |
| 5BL | 5BL:7717076  | 32 | Os03g58390.1 | 29 | Bradi1g05390.1 | 28 |
| 5BL | 5BL:10925378 | 33 | Os03g58400.1 | 30 | Bradi1g05380.1 | 29 |
| 5BL | 5BL:10924332 | 34 | Os03g58410.1 | 31 | Bradi1g05370.1 | 30 |

TaMet-5B1

|     |              |    |              |    |                |    |
|-----|--------------|----|--------------|----|----------------|----|
| 5BL | 5BL:10867378 | 35 | Os03g58420.1 | 32 | Bradi1g05350.1 | 31 |
| 5BL | 5BL:10795568 | 36 | Os03g58430.1 | 33 | Bradi1g05340.1 | 32 |
| 5BL | 5BL:10822114 | 37 |              |    | Bradi1g05330.1 | 33 |
| 5BL | 5BL:10825924 | 38 | Os03g58480.1 | 34 | Bradi1g05320.1 | 34 |
| 5BL | 5BL:10825924 | 39 |              |    | Bradi1g05310.1 | 35 |
| 5BL | 5BL:10893769 | 40 | Os03g58500.1 | 35 |                |    |
| 5BL | 5BL:10814367 | 41 |              |    | Bradi1g05280.1 | 36 |
| 5BL | 5BL:10879097 | 42 | Os03g58520.1 | 36 | Bradi1g05260.1 | 37 |
| 5BL | 5BL:10879097 | 43 | Os03g58530.1 | 37 | Bradi1g05250.1 | 38 |
| 5BL | 5BL:10838104 | 44 | Os03g58540.1 | 38 | Bradi1g05240.1 | 39 |
| 5BL | 5BL:10838104 | 45 |              |    | Bradi1g05200.1 | 40 |
| 5BL | 5BL:10840323 | 46 | Os03g58570.1 | 39 | Bradi1g05190.1 | 41 |
| 5BL | 5BL:10844621 | 47 | Os03g58580.1 | 40 | Bradi1g05180.1 | 42 |
| 5BL | 5BL:10914845 | 48 | Os03g58590.1 | 41 | Bradi1g05170.1 | 43 |
| 5BL | 5BL:10914845 | 49 |              |    | Bradi1g05160.1 | 44 |
| 5BL | 5BL:10816505 | 50 | Os03g58600.1 | 42 |                |    |
| 5BL | 5BL:10829640 | 51 | Os03g58620.1 | 43 |                |    |
| 5BL | 5BL:10922830 | 52 | Os03g58630.1 | 44 | Bradi1g05150.1 | 45 |
| 5BL | 5BL:10832199 | 53 | Os03g58670.1 | 46 |                |    |
| 5BL | 5BL:10801521 | 54 | Os03g58710.1 | 48 | Bradi1g05140.1 | 46 |
| 5BL | 5BL:10882913 | 55 | Os03g58640.1 | 45 | Bradi1g05130.1 | 47 |
| 5BL | 5BL:10815386 | 56 | Os03g58700.1 | 47 | Bradi1g05120.1 | 48 |
| 5BL | 5BL:10879461 | 57 | Os03g58720.1 | 49 | Bradi1g05110.1 | 49 |
| 5BL | 5BL:10855303 | 58 | Os03g58740.1 | 50 | Bradi1g05100.1 | 50 |
| 5BL | 5BL:10918676 | 59 | Os03g58750.1 | 51 | Bradi1g05090.1 | 51 |
| 5BL | 5BL:10865573 | 60 |              |    | Bradi1g05080.1 | 52 |
| 5BL | 5BL:10789814 | 61 | Os03g58780.1 | 52 | Bradi1g05070.1 | 53 |
| 5BL | 5BL:10735609 | 62 | Os03g58790.1 | 53 |                |    |
| 5BL | 5BL:10735609 | 63 | Os03g58800.1 | 54 |                |    |
| 5BL | 5BL:10787074 | 64 | Os03g58810.1 | 55 |                |    |
| 5BL | 5BL:10840449 | 65 | Os03g58820.1 | 56 | Bradi1g05060.1 | 54 |
| 5BL | 5BL:1283675  | 66 | Os03g58830.1 | 57 | Bradi1g05040.1 | 55 |
| 5BL | 5BL:10867098 | 67 | Os03g58840.1 | 58 | Bradi1g05030.1 | 56 |
| 5BL | 5BL:10824553 | 68 | Os03g58850.1 | 59 |                |    |
| 5BL | 5BL:10893855 | 69 |              |    | Bradi1g05020.1 | 57 |
| 5BL | 5BL:10905571 | 70 | Os03g58870.1 | 60 | Bradi1g05010.1 | 58 |
| 5BL | 5BL:10866215 | 71 | Os03g58890.1 | 61 | Bradi1g05000.1 | 59 |
| 5BL | 5BL:10871750 | 72 | Os03g58900.1 | 62 | Bradi1g04990.1 | 60 |
| 5BL | 5BL:10923312 | 73 | Os03g58910.2 | 63 | Bradi1g04980.1 | 61 |
| 5BL | 5BL:10871750 | 74 | Os03g58920.1 | 64 | Bradi1g04960.1 | 62 |
| 5DL | 5DL:4579940  | 1  | Os03g58040.1 | 1  | Bradi1g05680.1 | 1  |
| 5DL | 5DL:4568611  | 2  | Os03g58050.1 | 2  | Bradi1g05670.1 | 2  |
| 5DL | 5DL:4552307  | 3  | Os03g58060.1 | 3  | Bradi1g05660.1 | 3  |
| 5DL | 5DL:4503194  | 4  |              |    | Bradi1g05640.1 | 4  |
| 5DL | 5DL:4532486  | 5  | Os03g58080.1 | 4  | Bradi1g05630.1 | 5  |
| 5DL | 5DL:4532486  | 6  | Os03g58090.1 | 5  | Bradi1g05620.1 | 6  |
| 5DL | 5DL:4603458  | 7  | Os03g58100.1 | 6  | Bradi1g05610.1 | 7  |
| 5DL | 5DL:4603458  | 8  | Os03g58110.1 | 7  | Bradi1g05600.1 | 8  |
| 5DL | 5DL:4541028  | 9  | Os03g58120.1 | 8  | Bradi1g05590.1 | 9  |
| 5DL | 5DL:4513175  | 10 | Os03g58130.1 | 9  | Bradi1g05580.1 | 10 |
| 5DL | 5DL:4513175  | 11 | Os03g58140.1 | 10 | Bradi1g05570.1 | 11 |
| 5DL | 5DL:4513175  | 12 | Os03g58150.1 | 11 | Bradi1g05560.1 | 12 |

|     |             |    |              |    |                |    |
|-----|-------------|----|--------------|----|----------------|----|
| 5DL | 5DL:4513175 | 13 | Os03g58160.1 | 12 | Bradi1g05550.1 | 13 |
| 5DL | 5DL:4524567 | 14 | Os03g58170.1 | 13 | Bradi1g05540.1 | 14 |
| 5DL | 5DL:4500384 | 15 | Os03g58190.1 | 14 | Bradi1g05520.1 | 15 |
| 5DL | 5DL:857395  | 16 | Os03g58204.1 | 15 | Bradi1g05510.1 | 16 |
| 5DL | 5DL:4592014 | 17 | Os03g58230.1 | 16 | Bradi1g05500.1 | 17 |
| 5DL | 5DL:4603599 | 18 | Os03g58240.1 | 17 | Bradi1g05490.1 | 18 |
| 5DL | 5DL:4603599 | 19 | Os03g58250.1 | 18 | Bradi1g05480.1 | 19 |
| 5DL | 5DL:4600688 | 20 | Os03g58260.1 | 19 | Bradi1g05470.1 | 20 |
| 5DL | 5DL:4547569 | 21 | Os03g58300.1 | 20 |                |    |
| 5DL | 5DL:4547569 | 22 | Os03g58320.1 | 22 | Bradi1g05460.1 | 21 |
| 5DL | 5DL:4496471 | 23 | Os03g58290.1 | 23 | Bradi1g05450.1 | 22 |
| 5DL | 5DL:4515833 | 24 | Os03g58330.1 | 21 | Bradi1g05430.1 | 23 |
| 5DL | 5DL:4490001 | 25 | Os03g58340.1 | 24 | Bradi1g05420.1 | 24 |
| 5DL | 5DL:4490001 | 26 | Os03g58350.1 | 25 | Bradi1g05410.1 | 25 |
| 5DL | 5DL:3393307 | 27 | Os03g58390.1 | 26 | Bradi1g05390.1 | 26 |
| 5DL | 5DL:4608210 | 28 | Os03g58400.1 | 27 | Bradi1g05380.1 | 27 |
| 5DL | 5DL:4567022 | 29 | Os03g58410.1 | 28 | Bradi1g05370.1 | 28 |
| 5DL | 5DL:4566006 | 30 | Os03g58420.1 | 29 | Bradi1g05350.1 | 29 |
| 5DL | 5DL:4524187 | 31 | Os03g58430.1 | 30 | Bradi1g05340.1 | 30 |
| 5DL | 5DL:4556738 | 32 |              |    | Bradi1g05330.1 | 31 |
| 5DL | 5DL:2336334 | 33 | Os03g58480.1 | 33 | Bradi1g05320.1 | 32 |
| 5DL | 5DL:2910741 | 34 | Os03g58500.1 | 34 |                |    |
| 5DL | 5DL:4571477 | 35 |              |    | Bradi1g05290.1 | 33 |
| 5DL | 5DL:4571477 | 36 |              |    | Bradi1g05270.1 | 34 |
| 5DL | 5DL:1047956 | 37 |              |    | Bradi1g05280.1 | 35 |
| 5DL | 5DL:4608660 | 38 | Os03g58520.1 | 35 | Bradi1g05260.1 | 36 |
| 5DL | 5DL:4473836 | 39 | Os03g58530.1 | 36 | Bradi1g05250.1 | 37 |
| 5DL | 5DL:4495237 | 40 | Os03g58540.1 | 37 | Bradi1g05240.1 | 38 |
| 5DL | 5DL:4495237 | 41 |              |    | Bradi1g05200.1 | 39 |
| 5DL | 5DL:4572451 | 42 | Os03g58570.1 | 38 | Bradi1g05190.1 | 40 |
| 5DL | 5DL:4532064 | 43 | Os03g58580.1 | 39 | Bradi1g05180.1 | 41 |
| 5DL | 5DL:4532779 | 44 | Os03g58590.1 | 40 | Bradi1g05170.1 | 42 |
| 5DL | 5DL:4557608 | 45 | Os03g58600.1 | 41 | Bradi1g05160.1 | 43 |
| 5DL | 5DL:4546142 | 46 | Os03g58620.1 | 42 |                |    |
| 5DL | 5DL:4571419 | 47 | Os03g58630.1 | 43 | Bradi1g05150.1 | 44 |
| 5DL | 5DL:4571419 | 48 | Os03g58640.1 | 44 | Bradi1g05140.1 | 45 |
| 5DL | 5DL:4571419 | 49 |              |    | Bradi1g05130.1 | 46 |
| 5DL | 5DL:4523323 | 50 | Os03g58700.1 | 45 | Bradi1g05120.1 | 47 |
| 5DL | 5DL:4608197 | 51 | Os03g58710.1 | 46 |                |    |
| 5DL | 5DL:4541544 | 52 | Os03g58720.1 | 47 | Bradi1g05110.1 | 48 |
| 5DL | 5DL:4517824 | 53 | Os03g58740.1 | 48 | Bradi1g05100.1 | 49 |
| 5DL | 5DL:4603756 | 54 | Os03g58780.1 | 49 | Bradi1g05080.1 | 50 |
| 5DL | 5DL:4489274 | 55 | Os03g58790.1 | 50 |                |    |
| 5DL | 5DL:4517163 | 56 | Os03g58800.1 | 51 |                |    |
| 5DL | 5DL:4585906 | 57 | Os03g58810.1 | 52 |                |    |
| 5DL | 5DL:4509470 | 58 | Os03g58820.1 | 53 |                |    |
| 5DL | 5DL:4603756 | 59 |              |    | Bradi1g05070.1 | 51 |
| 5DL | 5DL:4509470 | 60 |              |    | Bradi1g05060.1 | 52 |
| 5DL | 5DL:4606041 | 61 |              |    | Bradi1g05050.1 | 53 |
| 5DL | 5DL:4489431 | 62 | Os03g58830.1 | 54 | Bradi1g05040.1 | 54 |
| 5DL | 5DL:4572971 | 63 | Os03g58840.1 | 55 | Bradi1g05030.1 | 55 |
| 5DL | 5DL:4551533 | 64 |              |    | Bradi1g05020.1 | 56 |

TaMet-5D1

|     |             |    |              |    |                |    |
|-----|-------------|----|--------------|----|----------------|----|
| 5DL | 5DL:4565592 | 65 | Os03g58850.1 | 56 |                |    |
| 5DL | 5DL:4599310 | 66 | Os03g58870.1 | 57 |                |    |
| 5DL | 5DL:4599310 | 67 | Os03g58890.1 | 58 |                |    |
| 5DL | 5DL:4570311 | 68 | Os03g58900.1 | 59 |                |    |
| 5DL | 5DL:4496706 | 69 | Os03g58910.2 | 60 |                |    |
| 5DL | 5DL:4557991 | 70 | Os03g58920.1 | 61 |                |    |
| 7AL | 7AL:4500764 | 1  | Os03g58040.1 | 1  | Bradi1g05680.1 | 1  |
| 7AL | 7AL:4535568 | 2  | Os03g58050.1 | 2  | Bradi1g05670.1 | 2  |
| 7AL | 7AL:4532056 | 3  | Os03g58400.1 | 3  | Bradi1g05380.1 | 3  |
| 7AL | 7AL:4441897 | 4  |              |    | Bradi1g05360.1 | 4  |
| 7AL | 7AL:4534795 | 5  | Os03g58430.1 | 5  | Bradi1g05340.1 | 5  |
| 7AL | 7AL:1206673 | 6  |              |    | Bradi1g05210.1 | 6  |
| 7AL | 7AL:4452921 | 7  | Os03g58570.1 | 7  | Bradi1g05190.1 | 7  |
| 7AL | 7AL:4510505 | 8  | Os03g58580.1 | 8  | Bradi1g05180.1 | 8  |
| 7AL | 7AL:4492195 | 9  | Os03g58630.1 | 9  | Bradi1g05150.1 | 9  |
| 7AL | 7AL:4492195 | 10 |              |    | Bradi1g05140.1 | 10 |
| 7AL | 7AL:4483901 | 11 | Os03g58670.1 | 11 |                |    |
| 7AL | 7AL:4472017 | 12 | Os03g58790.1 | 12 |                |    |
| 7AL | 7AL:4472017 | 13 | Os03g58800.1 | 13 |                |    |
| 7AL | 7AL:4472191 | 14 | Os03g58810.1 | 14 |                |    |
| 7AL | 7AL:4472620 | 15 | Os03g58830.1 | 15 | Bradi1g05040.1 | 11 |
| 7BL | 7BL:6701310 | 1  | Os03g58040.1 | 1  | Bradi1g05680.1 | 1  |
| 7BL | 7BL:6694785 | 2  | Os03g58050.1 | 2  | Bradi1g05670.1 | 2  |
| 7BL | 7BL:6665951 | 3  | Os03g58160.1 | 3  | Bradi1g05550.1 | 3  |
| 7BL | 7BL:6682174 | 4  | Os03g58400.1 | 4  | Bradi1g05380.1 | 4  |
| 7BL | 7BL:279551  | 5  | Os03g58670.1 | 6  |                |    |
| 7BL | 7BL:6743224 | 6  | Os03g58790.1 | 7  |                |    |
| 7BL | 7BL:6674971 | 7  | Os03g58800.1 | 8  |                |    |
| 7BL | 7BL:6697122 | 8  |              |    | Bradi1g05360.1 | 5  |
| 7BL | 7BL:6501267 | 9  |              |    | Bradi1g05350.1 | 6  |
| 7BL | 7BL:6710382 | 10 |              |    | Bradi1g05290.1 | 7  |
| 7BL | 7BL:6632036 | 11 |              |    | Bradi1g05280.1 | 8  |
| 7BL | 7BL:6710382 | 12 |              |    | Bradi1g05270.1 | 9  |
| 7BL | 7BL:6745812 | 13 |              |    | Bradi1g05210.1 | 10 |
| 7BL | 7BL:6689829 | 14 | Os03g58570.1 | 5  | Bradi1g05190.1 | 11 |
| 7BL | 7BL:6712874 | 15 | Os03g58830.1 | 9  | Bradi1g05040.1 | 12 |
| 7DL | 7DL:3378869 | 1  | Os03g58040.1 | 1  | Bradi1g05680.1 | 1  |
| 7DL | 7DL:3359841 | 2  | Os03g58050.1 | 2  | Bradi1g05670.1 | 2  |
| 7DL | 7DL:3344608 | 3  |              |    | Bradi1g05570.1 | 3  |
| 7DL | 7DL:3392185 | 4  | Os03g58400.1 | 3  | Bradi1g05380.1 | 4  |
| 7DL | 7DL:3392185 | 5  | Os03g58410.1 | 4  | Bradi1g05370.1 | 5  |
| 7DL | 7DL:3374548 | 6  |              |    | Bradi1g05360.1 | 6  |
| 7DL | 7DL:2581233 | 7  |              |    | Bradi1g05350.1 | 7  |
| 7DL | 7DL:3368356 | 8  |              |    | Bradi1g05210.1 | 8  |
| 7DL | 7DL:3341999 | 9  | Os03g58570.1 | 5  | Bradi1g05190.1 | 9  |
| 7DL | 7DL:3361750 | 10 | Os03g58580.1 | 6  | Bradi1g05180.1 | 10 |
| 7DL | 7DL:3366313 | 11 | Os03g58670.1 | 7  |                |    |
| 7DL | 7DL:3393412 | 12 | Os03g58790.1 | 8  |                |    |
| 7DL | 7DL:3393412 | 13 | Os03g58800.1 | 9  |                |    |
| 7DL | 7DL:3387834 | 14 | Os03g58810.1 | 10 |                |    |
| 7DL | 7DL:3392066 | 15 |              |    | Bradi1g05050.1 | 11 |

TaMet-7A1

TaMet-7B1

TaMet-7D1
