# Supplementary material for: Evolutionary history of Methyltransferase 1 genes in hexaploid wheat
Source: PubMed Central journal article supplement (PMC4223845; doi:10.1186/1471-2164-15-922), 2014-10-23
Supplement: 12864_2014_6631_MOESM8_ESM.pdf [file 12864_2014_6631_MOESM8_ESM.pdf]

## Additional file 8

| Stage                   | Wheat growth stage                  | Feekes scale | Zadoks scale | Leaves | Root | Stem | Spike | Grain |
|-------------------------|-------------------------------------|--------------|--------------|--------|------|------|-------|-------|
| Seedling                | First leaf through coleoptile       | 1            | 10           | x      | x    |      |       |       |
| Three leaves            | 3 leaves unfolded                   |              | 13           |        | x    |      |       |       |
| Three tillers           | Main shoot and 3 tillers            |              | 23           | x      |      |      |       |       |
| Spike at 1 cm           | Pseudostem erection                 | 5            | 30           |        |      | x    |       |       |
| Two nodes               | 2nd detectable node                 | 7            | 32           |        |      | x    | x     |       |
| Meiosis                 | Flag leaf ligule and collar visible | 9            | 39           |        | x    |      | x     |       |
| Anthesis                | 1/2 of flowering complete           |              | 65           |        |      | x    | x     |       |
| 2 DAAs<br>(50°C.days)   | Kernel (caryopsis) watery ripe      |              | 71           | x      |      |      |       | x     |
| 14 DAAs<br>(350°C.days) | Medium Milk                         |              | 75           |        |      |      |       | x     |
| 30 DAAs<br>(700°C.days) | Soft dough                          |              | 85           |        |      |      |       | x     |
